# Supplementary material
Source: ML conference proceedings conference paper supplement (https://proceedings.neurips.cc/paper_files/paper/2021/hash/761e6675f9e54673cc778e7fdb2823d2-Abstract.html)
Supplement: Supplementary file 1 [file 761e6675f9e54673cc778e7fdb2823d2-Supplemental.zip]

Archive with 3 entries (2 files):
- optimizing_reusable_knowledge_-Supplementary Material/
- optimizing_reusable_knowledge_-Supplementary Material/code_neurips_2021.zip
- optimizing_reusable_knowledge_-Supplementary Material/supplementary.pdf
